# Supplementary material for: A flexible and energy independent fluorescence radiation fiber film dosimeter fabricated by electrostatic spinning
Source: Royal Society of Chemistry journal article supplement (doi:10.1039/d4nr03392b), 2024-11-14
Supplement: d4nr03392b1.pdf [file d4nr03392b1.pdf]

## Supporting Information

### Flexible and Energy Independent Fluorescence Radiation Fiber Film Dosimeter by Electrostatic Spinning.

Mingshuo Tang,<sup>a</sup> Zhiwei He,<sup>a</sup> Zhihao Wang,<sup>a</sup> Yunlong Wang<sup>a\*</sup>

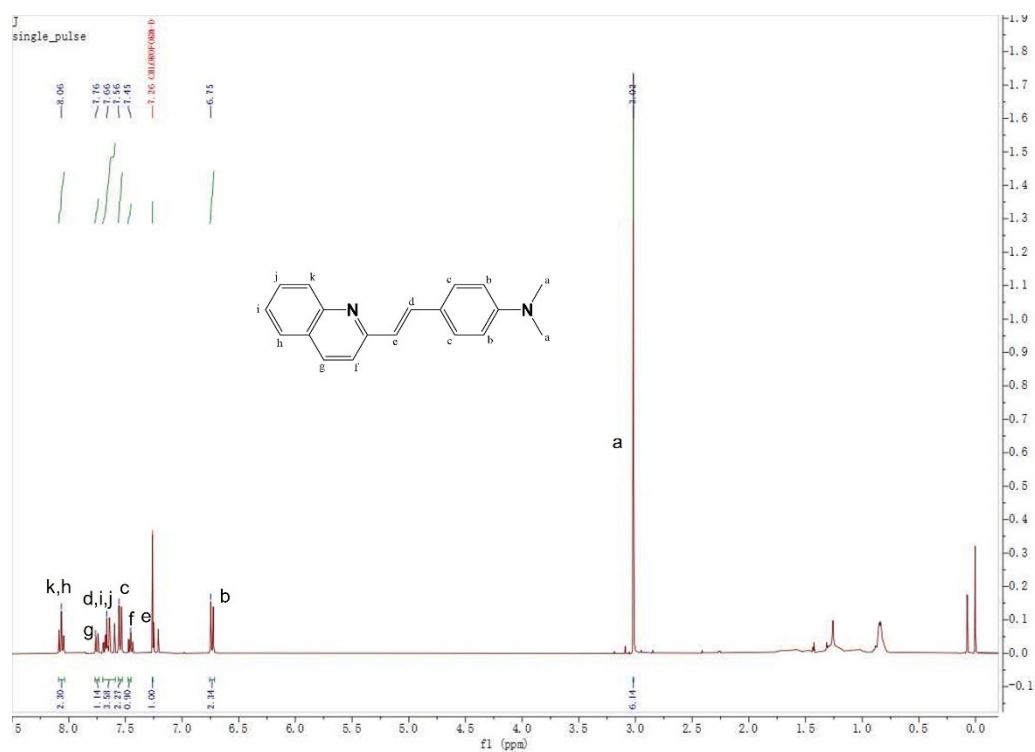

Figure S1. <sup>1</sup>H-NMR spectra of quinoline fluorescent dyes (QFDs) in CDCl<sub>3</sub>.

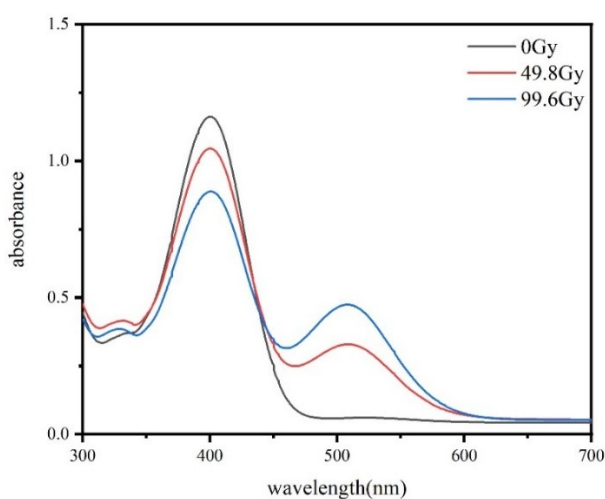

Figure S2. UV-vis spectrum of QFD (0.1 wt%) in PVC after exposure to different doses of X-rays.

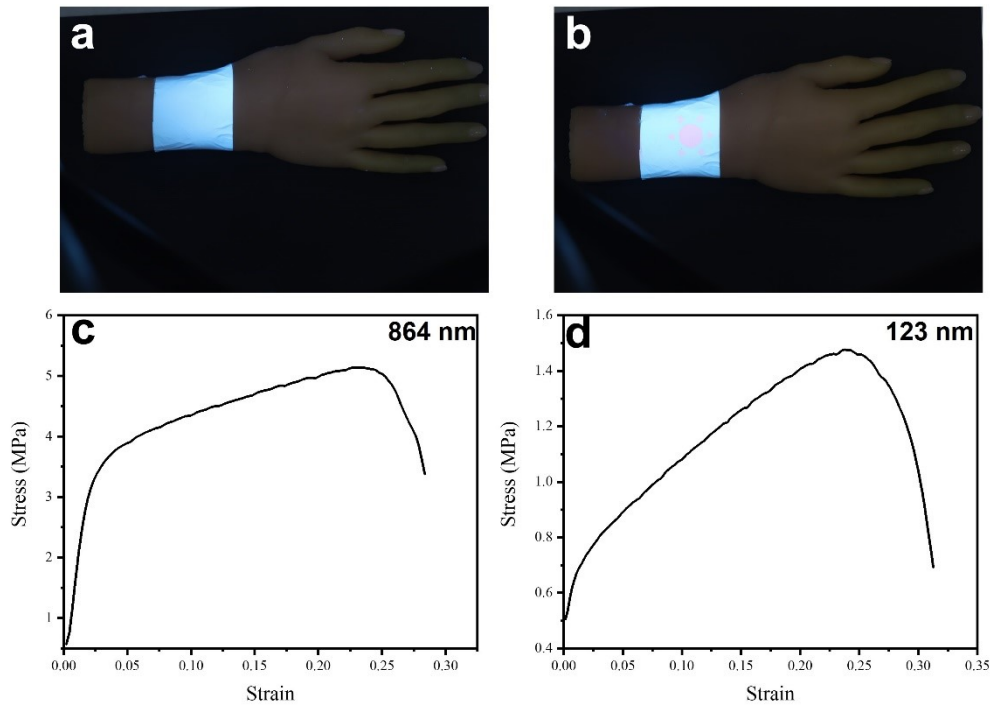

Figure S3. (a,b) Photographs of QFD-doped 864 nm PVC fiber film before and after X-ray irradiation of lead plate covered with a "☼" pattern. (c) Stress-strain curve of a fiber film dosimeter with a diameter of 864 nm. (d) Stress-strain curve of a fiber film dosimeter with a diameter of 123 nm.
